# Supplementary material for: The iBeetle large-scale RNAi screen reveals gene functions for insect development and physiology
Source: PubMed Central journal article supplement (PMC4525174; doi:10.1038/ncomms8822), 2015-07-28
Supplement: ncomms8822-s1.pdf [file ncomms8822-s1.pdf]

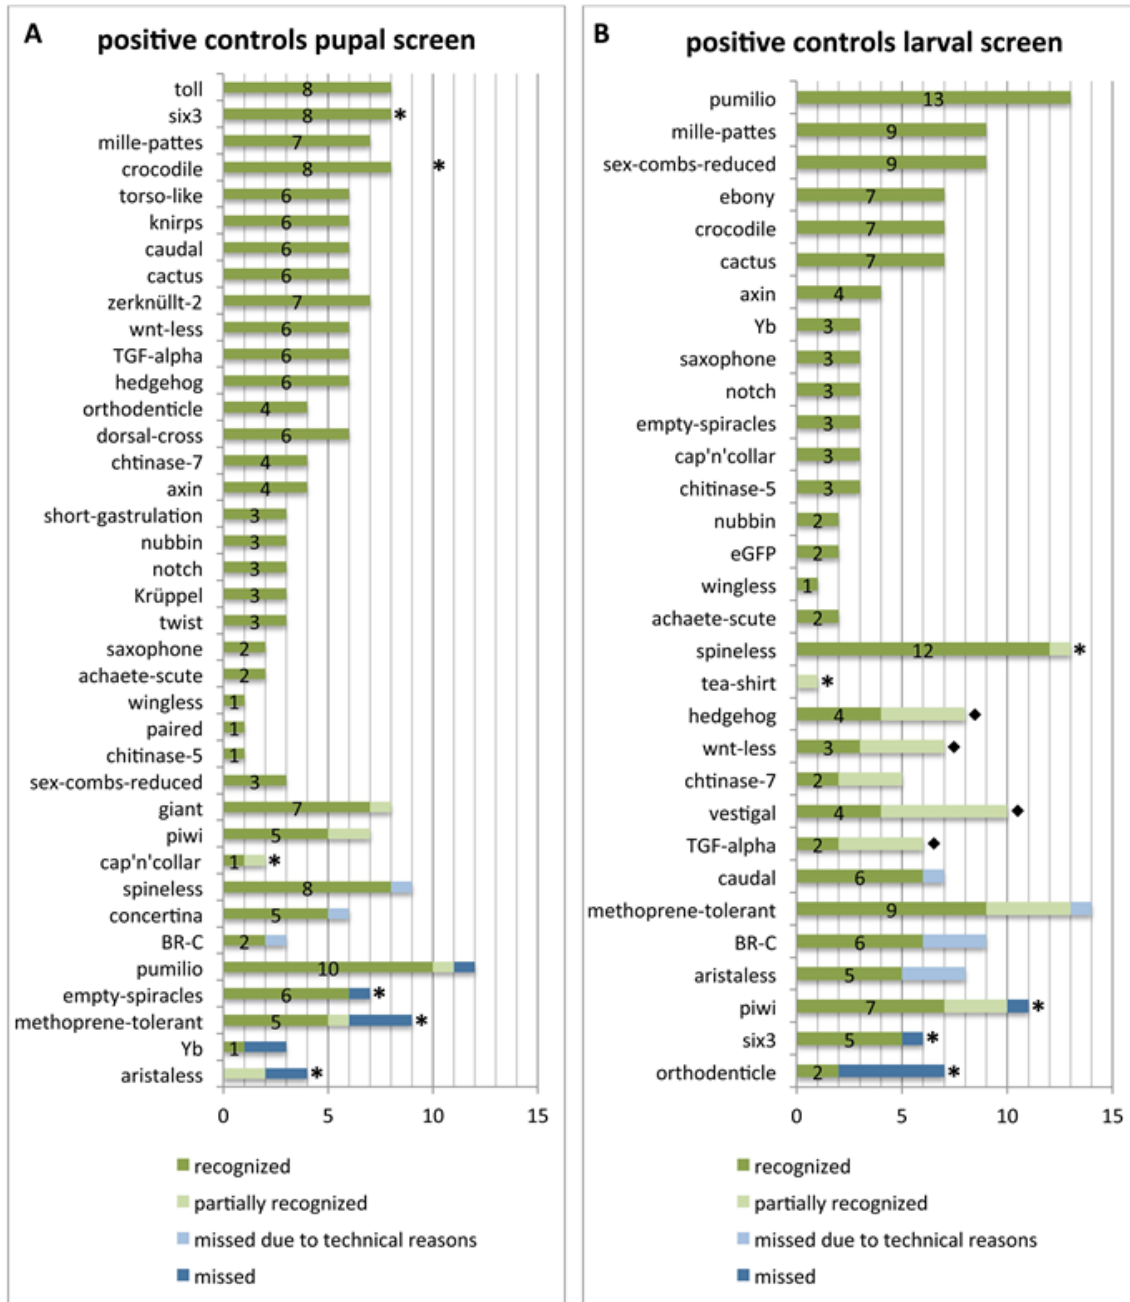

### Supplementary Figure 1 | Recognition of positive controls

The length of each bar indicates how often the respective control was used in the screen, and the color code indicates how often it was fully (dark green) or partially identified (light green), and how often it was missed (blue colors).

Asterisks indicate controls with a very subtle phenotype. Black diamonds indicate positive controls with complex phenotypes, which were rated as “partially recognized” when three quarter or more of phenotypic aspects were correctly identified.

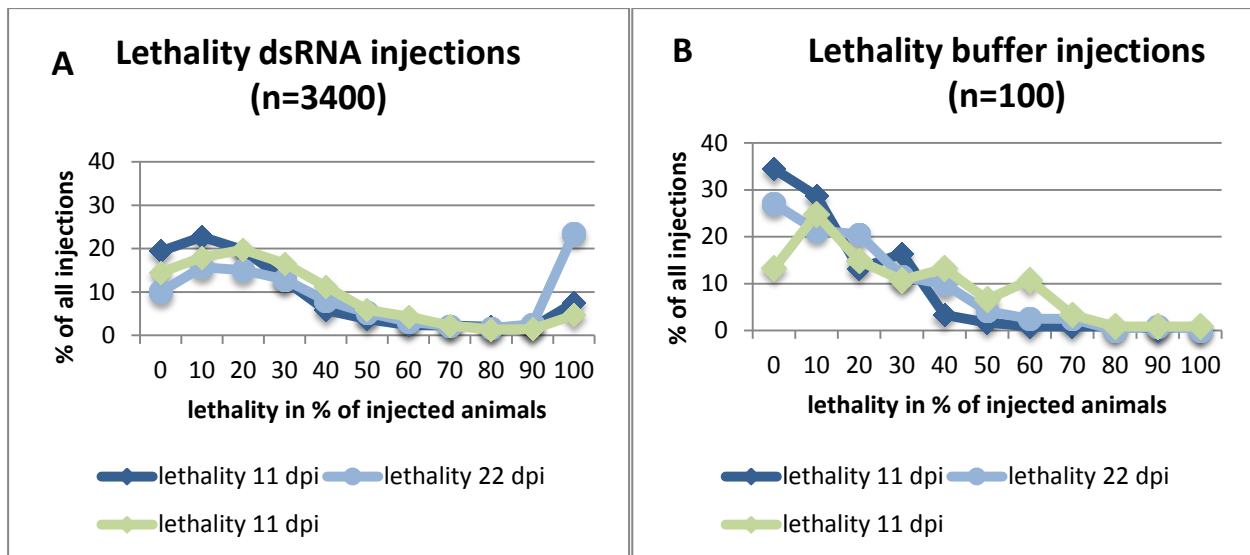

**Supplementary Figure 2 | Lethality of injected animals after dsRNA and buffer injections in the pupal and the larval injection screens**

A) Shown is the distribution of lethality rates of the injected animals in RNAi experiments. Lethality was documented at 11 and 22 days post injection (dpi) in the larval injection screen (dark and light blue) and at 11 dpi in the pupal injection screen (green). Most experiments showed a lethality of up to 30%. The distribution dropped up to 80% but increased again from 90% onwards. B) The same distributions shown for buffer injections. Here, the 90 and 100% values were not increased. Taken together, lethality rates below 80% were most likely “technical lethality” while higher lethality rates were probably the consequence of RNAi targeting an essential gene. Hence, we considered “lethality” as a phenotype only when at least 90% of the injected animals had died.

**a**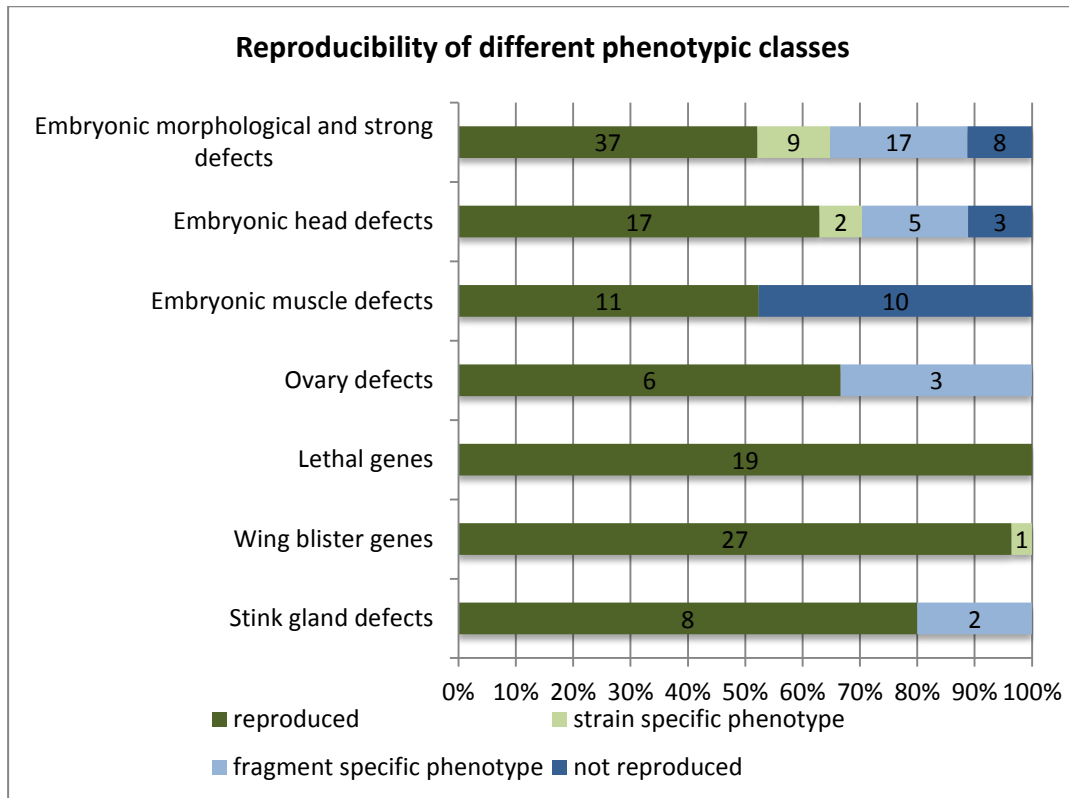**b**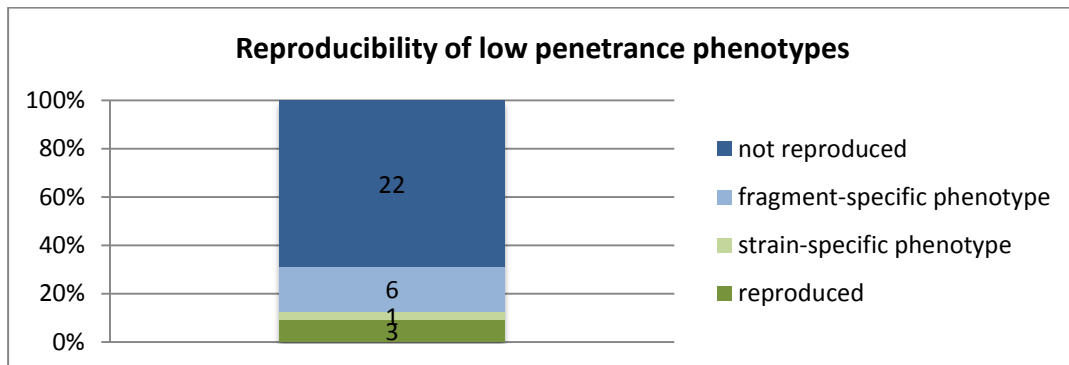

### Supplementary Figure 3 | Reproducibility depends on the phenotype class

158 genes matching our criteria for significant phenotypes (see Supplementary Table 3) were tested for reproducibility. Where possible, a non-overlapping fragment was injected into a strain with different genetic background (SB in most cases). If the phenotype was not reproduced, the non-overlapping fragment was injected into the strain used in the screen. This allowed distinguishing whether the non-reproduced phenotypes were due to fragment- or strain-specific differences (i.e. putative off target effects or genetic background effects). a) Phenotypes of different processes with a penetrance > 50% were tested. Some phenotype classes like lethality and wing blistering were reproduced with very high frequency while embryonic phenotypes were more frequently not reproduced (see main text for discussion on likely reason). b) Phenotypes that were annotated with a penetrance < 50% were frequently not reproducible.

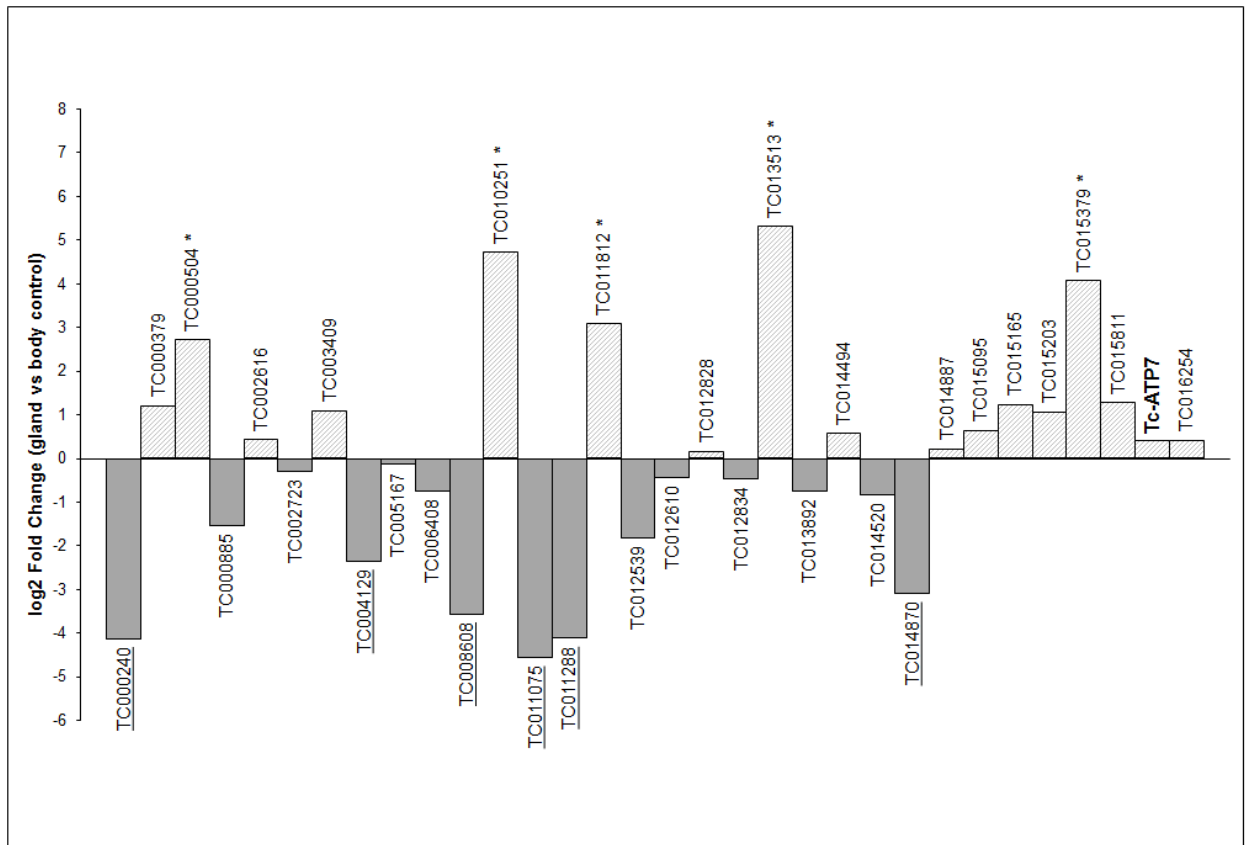

**Supplementary Figure 4 | Differential expression of 32 iBeetle-identified gland phenotype-causing genes**

We determined for the 32 genes with a confirmed odoriferous gland phenotype, whether the transcripts were enriched in the glands (data taken from Li et al. 2013)<sup>1</sup>. Each bar represents the level of expression of a gene in male abdominal glands relative to its expression in the mid-abdomen body control. Only five genes (marked with an asterisk) showed >4-fold enrichment in the odoriferous glands and would have been chosen as candidates based on a transcriptomics approach, thereby missing genes such as *Tc-ATP7* (bold) that is neither up nor down regulated but revealed a reduced gland content and melanosis phenotype upon knockdown. The iBeetle screen even identified genes causing a gland phenotype upon knock-down whose expression is strongly reduced in the odoriferous glands (underlined TC numbers). Thus, most genes detected in the iBeetle screen would not have been selected in an approach based on differential gene expression. Differences in the expression intensities are given as logarithm 2 fold change, calculated as  $\log_2$  of the quotient [depth (gland) / depth (control)], where depth is calculated as number of reads multiplied with length of reads (38bp) divided by specific length of gene transcript.

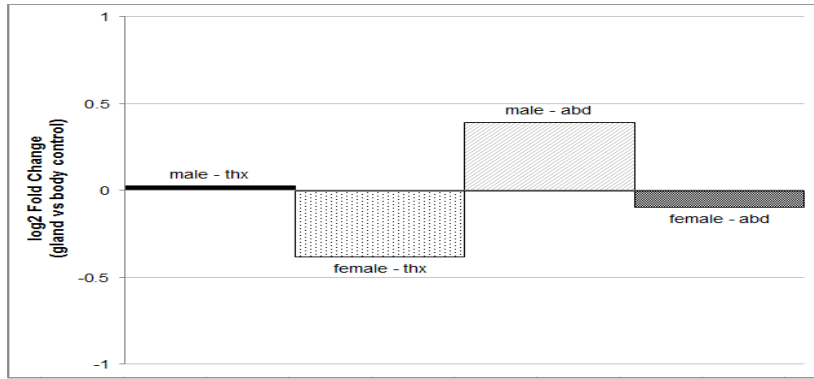

### Supplementary Figure 5 | Differential expression of *Tc-ATP7* in different gland tissues

Expression of the copper-transporting ATPase *Tc-ATP7* in male and female thoracic (thx) and abdominal (abd) odoriferous glands is not significantly de- or increased relative to the expression in the mid-abdomen body control.

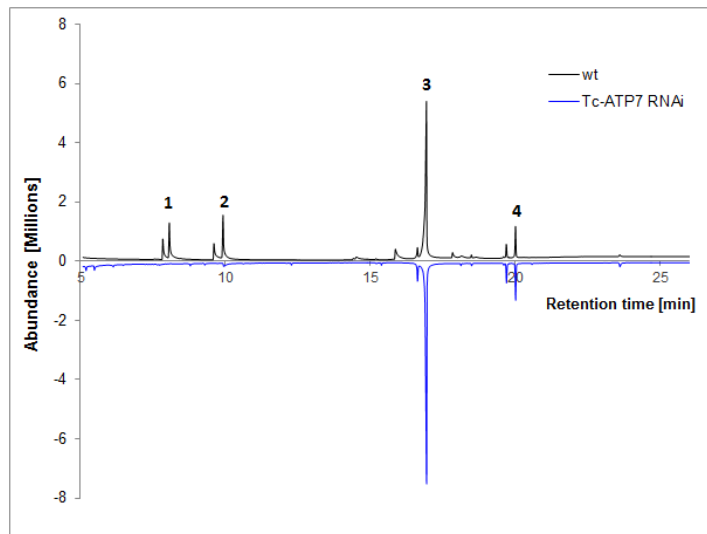

### Supplementary Figure 6 | Gas chromatograms of stink gland contents.

The four main volatile substances detected via GC-MS in abdominal glands of wild type beetles (black line) are 1: 2-Methyl-1,4-benzoquinone; 2: 2-Ethyl-1,4-benzoquinone; 3: 1-Pentadecene; 4: 1-Heptadecene. After knockdown of Tc-ATP7 (blue line, for better comparison plotted as negative values) gland secretions lack the benzoquinones (peaks 1 and 2).

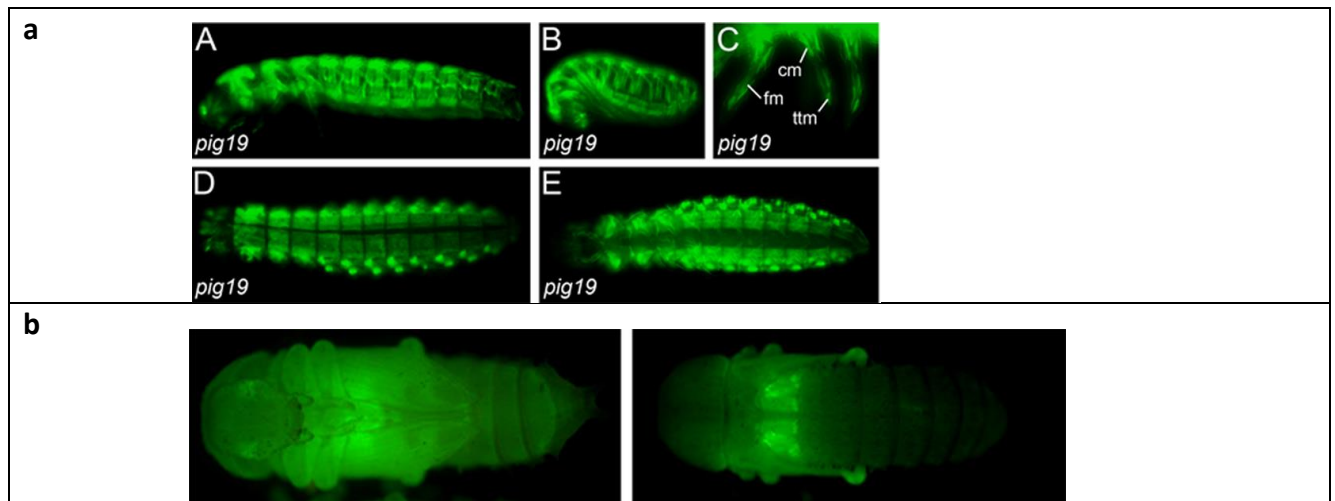

### Supplementary Figure 7 | Enhancer trap lines used in the screen

a) Females carrying the *pig19* enhancer trap were used for pupal injections. In this enhancer trap line EGFP is expressed in somatic muscles including leg muscles. Upon maturation, injected female pupae were mated with male beetles of the *black* strain (dark cuticle)<sup>2</sup> in order to allow quick assessment of adult survival of injected females without the need for repeated adult sexing.

b) For larval injections we used daughters of a cross between pearl females<sup>3</sup> and males of the D17Xred strain. This line is carrying a Minos transposon<sup>4</sup> insertion (D17) containing the 3xP3-EGFP marker which has captured an adult flight muscle enhancer. In addition, a piggyBac transposon carrying DsRed coding sequence driven by a 6xP3-promoter was inserted on the X-chromosome. Hence, female larvae were identified as larvae expressing the DsRed fluorescent protein in the eyes and the brain. Injected females were crossed to black males.

|        | Monday                                                                                         | Tuesday                                                                  | Wednesday                                                               | Thursday                                          | Friday                                                             | Saturday                                                        | Sunday                                                                                         |
|--------|------------------------------------------------------------------------------------------------|--------------------------------------------------------------------------|-------------------------------------------------------------------------|---------------------------------------------------|--------------------------------------------------------------------|-----------------------------------------------------------------|------------------------------------------------------------------------------------------------|
| week 1 |                                                                                                | d0 Injection (10h)                                                       |                                                                         | d0 Injection (10h)                                | d3 Transfer (1,5h)                                                 |                                                                 | d3 Transfer (1,5h)                                                                             |
|        |                                                                                                |                                                                          |                                                                         |                                                   | Cuticle anal. (2h)                                                 |                                                                 |                                                                                                |
|        |                                                                                                |                                                                          |                                                                         |                                                   |                                                                    |                                                                 |                                                                                                |
|        |                                                                                                |                                                                          |                                                                         |                                                   |                                                                    |                                                                 |                                                                                                |
| week 2 | d0 Injection (10h)                                                                             | Cuticle analysis (8h)                                                    | d0 Injection (10h)                                                      | d3 Transfer (1,5h)<br>d9 Sieving (0,75h)          | d0 Injection (10h)                                                 | d3 Transfer (1,5h)<br>d9 Sieving (0,75h)<br>d11 Sieving (0,75h) |                                                                                                |
|        |                                                                                                |                                                                          |                                                                         |                                                   |                                                                    |                                                                 |                                                                                                |
|        |                                                                                                |                                                                          |                                                                         |                                                   |                                                                    |                                                                 |                                                                                                |
|        |                                                                                                |                                                                          |                                                                         |                                                   |                                                                    |                                                                 |                                                                                                |
| week 3 | d13 Sieving Ovaries (4h)<br>d13 Cuticle Prep (3h)<br>d3 Transfer (1,5h)<br>d11 Sieving (0,75h) | d14 Fresh Prep Muscle analysis (8h)                                      | d9 Sieving (0,75h)<br>d13 Sieving Ovaries (4h)<br>d13 Cuticle Prep (3h) | d14 Fresh Prep Muscle analysis (8h)               | d9 Sieving (0,75h)<br>d11 Sieving (0,75h)<br>Cuticle analysis (6h) |                                                                 | d13 Sieving Ovaries (4h)<br>d13 Cuticle Prep (3h)<br>d9 Sieving (0,75h)<br>d11 Sieving (0,75h) |
|        |                                                                                                |                                                                          |                                                                         |                                                   |                                                                    |                                                                 |                                                                                                |
|        |                                                                                                |                                                                          |                                                                         |                                                   |                                                                    |                                                                 |                                                                                                |
|        |                                                                                                |                                                                          |                                                                         |                                                   |                                                                    |                                                                 |                                                                                                |
| week 4 | d14 Fresh Prep Muscle analysis (8h)                                                            | d11 Sieving (0,75h)<br>d13 Sieving Ovaries (4h)<br>d13 Cuticle Prep (3h) | d14 Fresh Prep Muscle analysis (8h)                                     | d13 Sieving Ovaries (4h)<br>d13 Cuticle Prep (3h) | d14 Fresh Prep Muscle analysis (8h)                                |                                                                 |                                                                                                |
|        |                                                                                                |                                                                          |                                                                         |                                                   |                                                                    |                                                                 |                                                                                                |
|        |                                                                                                |                                                                          |                                                                         |                                                   |                                                                    |                                                                 |                                                                                                |
|        |                                                                                                |                                                                          |                                                                         |                                                   |                                                                    |                                                                 |                                                                                                |
| week 5 | Cuticle analysis (8h)                                                                          |                                                                          | Cuticle analysis (8h)                                                   |                                                   | Cuticle analysis (8h)                                              |                                                                 |                                                                                                |
|        |                                                                                                |                                                                          |                                                                         |                                                   |                                                                    |                                                                 |                                                                                                |
|        |                                                                                                |                                                                          |                                                                         |                                                   |                                                                    |                                                                 |                                                                                                |
|        |                                                                                                |                                                                          |                                                                         |                                                   |                                                                    |                                                                 |                                                                                                |
| week 6 |                                                                                                | d0 Injection (10h)                                                       |                                                                         | d0 Injection (10h)                                | Cuticle anal. (2h)<br>d3 Transfer (1,5h)                           |                                                                 | d3 Transfer (1,5h)                                                                             |
|        |                                                                                                |                                                                          |                                                                         |                                                   |                                                                    |                                                                 |                                                                                                |
|        |                                                                                                |                                                                          |                                                                         |                                                   |                                                                    |                                                                 |                                                                                                |
|        |                                                                                                |                                                                          |                                                                         |                                                   |                                                                    |                                                                 |                                                                                                |
| week 7 | d0 Injection (10h)                                                                             | Cuticle analysis (8h)                                                    | d0 Injection (10h)                                                      | d3 Transfer (1,5h)<br>d9 Sieving (0,75h)          | d0 Injection (10h)                                                 | d3 Transfer (1,5h)<br>d9 Sieving (0,75h)<br>d11 Sieving (0,75h) |                                                                                                |
|        |                                                                                                |                                                                          |                                                                         |                                                   |                                                                    |                                                                 |                                                                                                |
|        |                                                                                                |                                                                          |                                                                         |                                                   |                                                                    |                                                                 |                                                                                                |
|        |                                                                                                |                                                                          |                                                                         |                                                   |                                                                    |                                                                 |                                                                                                |

### Supplementary Figure 8 | Schedule of the pupal injection screen

The five repetitions performed in parallel are shown in different colours. Each step of each repetition is shown at the day of processing and the approximate time required for this step is given. After five weeks, the same schedule was repeated (open boxes in week 6 and 7). The cuticle analysis can be performed at any time, because the cuticle preparations are stable over time.



|         | Monday                  | Tuesday                 | Wednesday                        | Thursday                | Friday              | Saturday                | Sunday                  |
|---------|-------------------------|-------------------------|----------------------------------|-------------------------|---------------------|-------------------------|-------------------------|
| week 1  | d25 Ovary analysis (2h) |                         | d38-41 Stink gland analysis (3h) | d0 Injection (8h)       | d0 Injection (8h)   |                         |                         |
|         | Ovary analysis (2h)     |                         |                                  |                         |                     |                         |                         |
|         | d18 Adult analysis (4h) | d18 Adult analysis (4h) |                                  |                         | d20 Sieving (0,3h)  |                         |                         |
| week 2  | Ovary analysis (2h)     |                         | d38-41 Stink gland analysis (3h) | d0 Injection (8h)       | d0 Injection (8h)   |                         |                         |
|         | Ovary analysis (2h)     |                         |                                  |                         |                     |                         |                         |
|         |                         |                         |                                  |                         |                     |                         |                         |
| week 3  | d11 Pupal analysis (7h) | d11 Pupal analysis (7h) | d38-41 Stink gland analysis (3h) | d0 Injection (8h)       | d0 Injection (8h)   | d16 Adult analysis (4h) | d16 Adult analysis (4h) |
|         |                         |                         |                                  |                         |                     |                         |                         |
|         |                         |                         |                                  |                         |                     |                         |                         |
| week 4  | d11 Pupal analysis (7h) | d11 Pupal analysis (7h) | d20 Sieving (0,3h) analysis (3h) | d0 Injection (8h)       | d0 Injection (8h)   | d16 Adult analysis (4h) | d16 Adult analysis (4h) |
|         |                         |                         |                                  |                         |                     | d23 Ovary analysis (2h) | Ovary analysis (2h)     |
|         |                         |                         |                                  | d20 Sieving (0,3h)      |                     |                         |                         |
| week 5  | d11 Pupal analysis (7h) | d11 Pupal analysis (7h) |                                  | d21 Ovary analysis (2h) | Ovary analysis (2h) |                         |                         |
|         |                         |                         |                                  |                         |                     |                         |                         |
|         | d20 Sieving (0,3h)      | d20 Sieving (0,3h)      |                                  |                         |                     |                         |                         |
| week 6  | d11 Pupal analysis (7h) | d11 Pupal analysis (7h) |                                  |                         | d20 Sieving (0,3h)  |                         |                         |
|         |                         |                         |                                  |                         | d20 Sieving (0,3h)  |                         |                         |
|         | d18 Adult analysis (4h) | d18 Adult analysis (4h) |                                  |                         |                     |                         |                         |
| week 7  | d25 Ovary analysis (2h) |                         | d38-41 Stink gland analysis (3h) | d0 Injection (8h)       | d20 Sieving (0,3h)  |                         |                         |
|         | d24 Ovary analysis (2h) |                         |                                  |                         | d20 Sieving (0,3h)  |                         |                         |
|         | d18 Adult analysis (4h) | d18 Adult analysis (4h) |                                  |                         | d0 Injection (8h)   |                         |                         |
| week 8  | Ovary analysis (2h)     |                         | d38-41 Stink gland analysis (3h) | d0 Injection (8h)       | d0 Injection (8h)   |                         |                         |
|         | Ovary analysis (2h)     |                         |                                  |                         |                     |                         |                         |
|         |                         |                         |                                  |                         |                     |                         |                         |
| week 9  | d11 Pupal analysis (7h) | d11 Pupal analysis (7h) | d38-41 Stink gland analysis (3h) | d0 Injection (8h)       | d0 Injection (8h)   | d16 Adult analysis (4h) | d16 Adult analysis (4h) |
|         |                         |                         |                                  |                         |                     |                         |                         |
|         |                         |                         |                                  |                         |                     |                         |                         |
| week 10 | d11 Pupal analysis (7h) | d11 Pupal analysis (7h) | d20 Sieving (0,3h)               | d0 Injection (8h)       | d0 Injection (8h)   | d16 Adult analysis (4h) | d16 Adult analysis (4h) |
|         |                         |                         | d38-41 Stink gland analysis (3h) |                         |                     | d23 Ovary analysis (2h) | Ovary analysis (2h)     |
|         |                         |                         |                                  | d20 Sieving (0,3h)      |                     |                         |                         |

### Supplementary Figure 9 | Schedule of the larval injection screen

In the larval injection screen, eight repetitions were performed in parallel and the schedule repeated after 6 weeks.

**Supplementary Table 1 | Comparison of iBeetle analysis set with official gene set**

|                                       | Official gene set |     | iBeetle gene set |     | Genes with Phenotype in iBeetle |     |                                            |
|---------------------------------------|-------------------|-----|------------------|-----|---------------------------------|-----|--------------------------------------------|
|                                       | N                 | %   | N'               | %   | N''                             | %   | % of iBeetle genes with phenotype (N''/N') |
| <b>Genes</b>                          | 16561             | 100 | 3400             | 100 | 1915                            | 100 | 56                                         |
| <b>Conserved</b>                      | 9838              | 59  | 2784             | 82  | 1659                            | 87  | 60                                         |
| <b>Beetle specific</b>                | 6723              | 41  | 616              | 18  | 256                             | 13  | 42                                         |
| <b>Conserved in <i>Drosophila</i></b> | 8334              | 50  | 2496             | 73  | 1546                            | 81  | 62                                         |
| <b>Lost in <i>Drosophila</i></b>      | 1505              | 9   | 288              | 8   | 113                             | 6   | 39                                         |

"beetle specific": NCBI blast did reveal orthologs only in beetles;

"lost in *Drosophila*": NCBI blast revealed orthologs in other insects but not *Drosophila*

Note: the percentage in the rightmost column relates the values in column N'' to respective values in column N', e.g. 39%=113/288.

**Supplementary Table 2 | iBeetle results for genes with published or known phenotypes**

| <b>Pupal injection screen</b> |             |             |                                                                                                                             |                                                      |
|-------------------------------|-------------|-------------|-----------------------------------------------------------------------------------------------------------------------------|------------------------------------------------------|
| <b>gene</b>                   | <b>iB-#</b> | <b>TC-#</b> | <b>screening result</b>                                                                                                     | <b>reference</b>                                     |
| achaete-scute                 | iB_04489    | TC008433    | loss of larval bristles and setae                                                                                           | Wheeler et al. 2003, this study                      |
| axin                          | iB_04108    | TC006314    | as expected                                                                                                                 | Fu et al. 2012                                       |
| broad-complex                 | iB_03960    | TC005474    | no phenotype, potentially due to alternative splicing                                                                       | this study                                           |
| cactus                        | iB_00322    | TC002003    | as expected                                                                                                                 | Fonseca et al. 2008; Roth unpublished                |
| CG16778                       | iB_04153    | TC006481    | muscle defects, differs from earlier experiments where defects in embryonic head and abdominal development were found       | Schoppmeier, unpublished                             |
| Delta                         | iB_03691    | TC004114    | as expected                                                                                                                 | Aranda et al. 2007, Schoppmeier unpublished          |
| decapentaplegic               | iB_04497    | TC008466    | lethality of injected animals, differs from earlier experiments where strong embryonic defects, but no lethality were found | Van der Zee et al., 2006; Ober & Jockusch, 2006      |
| dorsocross                    | iB_05219    | TC012346    | as expected, dorsal closure defect, appendage and abdominal defects                                                         | Panfilio unpublished, positive control in this study |
| EGF-Receptor                  | iB_00647    | TC003986    | as expected, oogenesis defects                                                                                              | Großmann, unpublished                                |
| folded gastrulation           | iB_04203    | TC006722    | dorso-ventral patterning                                                                                                    | Roth, unpublished                                    |
| Frizzled-1                    | iB_02240    | TC014055    | early embryonic lethality, stronger defect than published                                                                   | Beermann et al. 2011                                 |
| glass-bottom-boat             | iB_05543    | TC014017    | as expected, lipid homeostasis and sterility                                                                                | Namigai & Suzuki 2012, Trauner unpublished           |
| hairy                         | iB_05339    | TC012851    | as expected                                                                                                                 | Aranda et al. 2008                                   |
| hunchback                     | iB_05451    | TC013553    | as expected                                                                                                                 | Marques-Souza et al. 2008                            |
| knirps                        | iB_03553    | TC003413    | early embryonic lethality, stronger defect than published                                                                   | Cerny et al. 2008                                    |
| lame-duck                     | iB_06061    | TC030749    | as expected, muscle defects                                                                                                 | Frasch, unpublished                                  |
| lim1                          | iB_05727    | TC014939    | early embryonic lethality, stronger defect than published                                                                   | Posnien et al. 2011                                  |
| methoprene-tolerant           | iB_03648    | TC003908    | as expected, subtle leg defects                                                                                             | this study                                           |
| mirror/irx                    | iB_03595    | TC003634    | as expected, oogenesis defects                                                                                              | Schoppmeier, unpublished                             |
| odd-skipped                   | iB_04013    | TC005785    | as expected                                                                                                                 | Choe et al. 2006                                     |
| org-1                         | iB_05796    | TC015327    | as expected, muscle defects                                                                                                 | Frasch, unpublished                                  |
| patched                       | iB_03831    | TC004745    | as expected                                                                                                                 | Farzana et al. 2008                                  |

|                      |          |          |                                                                                                                               |                                                      |
|----------------------|----------|----------|-------------------------------------------------------------------------------------------------------------------------------|------------------------------------------------------|
| pelle                | iB_02469 | TC015365 | as expected, strong embryonic defects                                                                                         | Roth, unpublished                                    |
| porcupine            | iB_03822 | TC004714 | as expected                                                                                                                   | Bolognesi et al. 2009                                |
| pumilio              | iB_03898 | TC005073 | as expected                                                                                                                   | Schmitt-Engel et al. 2012                            |
| saxophone            | iB_02534 | TC015948 | as expected, reduced fecundity                                                                                                | Roth, unpublished                                    |
| sex-combs-reduced    | iB_00186 | TC000917 | as expected, slightly stronger than published                                                                                 | Curtis et al. 2001; positive control in this study   |
| sloppy-paired        | iB_04421 | TC008062 | as expected                                                                                                                   | Choe et al. 2006, Choe et al. 2007                   |
| TGF-alpha            | iB_03555 | TC003429 | as expected                                                                                                                   | Lynch et al. 2010; Roth unpublished                  |
| tolloid              | iB_01822 | TC011197 | as expected                                                                                                                   | Fonseca et al. 2010                                  |
| Torso                | iB_04720 | TC009906 | as expected                                                                                                                   | Schoppmeier et al. 2005                              |
| torso-like           | iB_04423 | TC008090 | as expected                                                                                                                   | Schoppmeier et al. 2005                              |
| twisted-gastrulation | iB_00592 | TC003620 | as expected                                                                                                                   | Fonseca et al. 2010                                  |
| wingless             | iB_05552 | TC014084 | as expected                                                                                                                   | Bolognesi et al. 2008                                |
| wnt-less             | iB_00832 | TC005345 | as expected                                                                                                                   | Bolognesi et al. 2008                                |
| yb                   | iB_02707 | TC000053 | as expected                                                                                                                   | positive control in this study, Klingler unpublished |
| zfh2                 | iB_03646 | TC003891 | lethality of injected animals, differs from earlier experiments where defects of leg development, but no lethality were found | Prpic-Schäper, unpublished                           |

---

### Larval injection screen

| gene            | iB-#     | TC-#     | screening result                                                                       | reference                                                                          |
|-----------------|----------|----------|----------------------------------------------------------------------------------------|------------------------------------------------------------------------------------|
| achaete-scute   | iB_04489 | TC008433 | as expected, lethality just lethality, published subtle appendage phenotype was missed | positive control in this study                                                     |
| bric-a-brac     | iB_03591 | TC003621 | as expected, slightly stronger                                                         | Angelini et al. 2009, 2012; Konopova et al. 2008; Konopova, personal communication |
| broad-complex   | iB_03960 | TC005474 | as expected                                                                            | Fonseca et al. 2008; Roth unpublished                                              |
| cactus          | iB_00322 | TC002003 | as expected                                                                            | positive control in this study                                                     |
| Delta           | iB_03691 | TC004114 | larval lethality, stronger than published                                              | Angelini et al. 2012a+b                                                            |
| decapentaplegic | iB_04497 | TC008466 | larval lethality, stronger than published                                              | Knorr et al. 2009                                                                  |
| ebony           | iB_05139 | TC011976 | as expected                                                                            | Park et al. 2005                                                                   |

|                            |          |          |                                                                                                                                               |                                                            |
|----------------------------|----------|----------|-----------------------------------------------------------------------------------------------------------------------------------------------|------------------------------------------------------------|
| EGF-receptor               | iB_00647 | TC003986 | as expected, lethality                                                                                                                        | Großmann, unpublished                                      |
| empty-spiracles            | iB_05098 | TC011763 | wing and labrum defects, pupal lethality, differs from experiments in this study, where some lethality, but no morphological defect was found | positive control in this study                             |
| homothorax                 | iB_04526 | TC008629 | prepupal lethality, stronger than published                                                                                                   | Angelini et al. 2012a+b                                    |
| knickkopf                  | iB_04889 | TC010653 | as expected                                                                                                                                   | Chaudhari et al. 2011                                      |
| knirps                     | iB_03553 | TC003413 | prepupal lethality, differs from experiments in this study, where no phenotype was found, but earlier experiments showed similar defects      | positive control in this study, Schmitt-Engel, unpublished |
| laccase 2                  | iB_01701 | TC010489 | larval lethality, stronger than published                                                                                                     | Arakane et al. 2005                                        |
| lim1                       | iB_05727 | TC014939 | as expected, slightly stronger                                                                                                                | Angelini et al. 2012b                                      |
| matrix metalloproteinase 1 | iB_02266 | TC014266 | as expected                                                                                                                                   | Knorr et al. 2009                                          |
| mef2                       | iB_04920 | TC010850 | as expected, lethality                                                                                                                        | Frasch, unpublished                                        |
| methoprene-tolerant        | iB_03648 | TC003908 | larval lethality, technical artifact                                                                                                          | Konopova et al. 2007; positive control in this study       |
| odd-skipped                | iB_04013 | TC005785 | just labial misorientation, weaker defect than published                                                                                      | Angelini et al. 2012                                       |
| pumilio                    | iB_03898 | TC005073 | larval lethality, technical artifact                                                                                                          | Schmitt-Engel, unpublished                                 |
| serrate                    | iB_04764 | TC010113 | as expected, slightly stronger                                                                                                                | Angelini et al. 2009                                       |
| sex-combs-reduced          | iB_00186 | TC000917 | as expected                                                                                                                                   | Tomoyasu et al. 2005                                       |
| sister-of-odd-and-bowl     | iB_04014 | TC005788 | as expected, slightly stronger                                                                                                                | Angelini et al. 2009, 2012a,b                              |
| Sp8                        | iB_05083 | TC011697 | as expected                                                                                                                                   | Beermann et al. 2004                                       |
| TGF-alpha                  | iB_03555 | TC003429 | as expected, morphological defects in pupae                                                                                                   | positive control in this study                             |
| vestigial                  | iB_04931 | TC010897 | as expected                                                                                                                                   | positive control in this study                             |
| wingless                   | iB_05552 | TC014084 | as expected, morphological defects in pupae and adults                                                                                        | positive control in this study                             |
| wnt-less                   | iB_00832 | TC005345 | as expected, morphological defects in pupae                                                                                                   | positive control in this study                             |
| yb                         | iB_02707 | TC000053 | as expected, ovariogenesis defects                                                                                                            | positive control in this study, Klingler unpublished       |

**Supplementary Table 3 | Definition of phenotypic categories used in large scale comparison**

| <b>Phenotype</b>                                 | <b>Criteria</b>                                                                                                                                                                                                                                                                                                                                                                                                                                                                                                                                                                                                                                  |
|--------------------------------------------------|--------------------------------------------------------------------------------------------------------------------------------------------------------------------------------------------------------------------------------------------------------------------------------------------------------------------------------------------------------------------------------------------------------------------------------------------------------------------------------------------------------------------------------------------------------------------------------------------------------------------------------------------------|
| <b>no phenotype</b>                              | not in one of the other categories                                                                                                                                                                                                                                                                                                                                                                                                                                                                                                                                                                                                               |
| <b>lethal after larval injection</b>             | > 80 % of the injected animals died within 22 dpi                                                                                                                                                                                                                                                                                                                                                                                                                                                                                                                                                                                                |
| <b>parental lethal after pupal injection</b>     | > 80 % of the injected animals died within 11 dpi                                                                                                                                                                                                                                                                                                                                                                                                                                                                                                                                                                                                |
| <b>embryonic lethal</b>                          | > 50 animals in cuticle preparation of clutch 9 dpi, or > 20 animals in cuticle preparation of clutch 9 dpi without any hatched animals, or > 20 animals in fresh preparation of clutch 11 dpi with > 50% embryos died before cuticle secretion/did not develop                                                                                                                                                                                                                                                                                                                                                                                  |
| <b>morphological defects of larval cuticle</b>   | > 50 animals in cuticle preparation of clutch 9 dpi, while > 70 % hatched, preparation with > 50% larvae showing morphological defects but clearly visible polarity and at least 2 distinguishable tagmata; or > 50 animals in cuticle preparation of clutch 9 dpi, while 10 - 70 % hatched, preparation with > 30 % larvae showing morphological defects but clearly visible polarity and at least 2 distinguishable tagmata; or > 20 animals in cuticle preparation of clutch 9 dpi while no animals hatched, preparation with > 30 % larvae showing morphological defects but clearly visible polarity and at least 2 distinguishable tagmata |
| <b>strong defects of larval cuticle</b>          | > 50 animals in cuticle preparation of clutch 9 dpi, while > 70 % hatched, preparation with > 50 % larvae without clear tagmatic division or polarity; or > 50 animals in cuticle preparation of clutch 9 dpi, while 10 - 70 % hatched, preparation with > 30 % larvae without clear tagmatic division or polarity; or > 20 animals in cuticle preparation of clutch 9 dpi while no animals hatched, preparation with > 30 % larvae without clear tagmatic division or polarity                                                                                                                                                                  |
| <b>embryonic lethal before cuticle secretion</b> | > 50 animals in cuticle preparation of clutch 9 dpi, preparation with > 50 % egg shells without larval cuticle or >30 % egg shells without larval cuticle in combination with morphological defects (see above); or > 20 animals in cuticle preparation of clutch 9 dpi while no animals hatched, preparation with > 50 % egg shells without larval cuticle or >30 % egg shells without larval cuticle in combination with morphological defects (see above); or > 20 animals in fresh preparation of clutch 11 dpi with > 50% embryos died before cuticle secretion/did not develop                                                             |
| <b>defects in metamorphosis control</b>          | > 3 injected animals died during development from prepupal to adult stage                                                                                                                                                                                                                                                                                                                                                                                                                                                                                                                                                                        |
| <b>defects of adult structures</b>               | > 2 injected animals with morphological defects of pupal or adult structures (except ovary defects)                                                                                                                                                                                                                                                                                                                                                                                                                                                                                                                                              |
| <b>ovary defects</b>                             | > 50 % of dissected animals with reduced egg production show morphological defects of ovaries and no reduced fat body 22 dpi or 13 dpi                                                                                                                                                                                                                                                                                                                                                                                                                                                                                                           |
| <b>morphological defects of pupae or adults</b>  | > 2 injected animals with morphological defects of external pupal or adult structures                                                                                                                                                                                                                                                                                                                                                                                                                                                                                                                                                            |

**morphological defects of pupal or adult legs** > 2 injected animals with morphological defects of pupal or adult legs

**morphological defects of larval legs** > 50 animals in cuticle preparation of clutch 9 dpi, while > 70 % hatched, preparation with > 50% larvae showing leg defects; or > 50 animals in cuticle preparation of clutch 9 dpi, while 10 - 70 % hatched, preparation with > 30 % larvae showing leg defects; or > 20 animals in cuticle preparation of clutch 9 dpi while no animals hatched, preparation with > 30 % larvae showing leg defects

**defects of adult thoracic musculature** > 2 injected animals with defects of the developing dorsal thoracic musculature (marked at pupal stage by d17 enhancer trap)

**defects of larval musculature** > 20 animals in fresh preparation of clutch 11 dpi with > 30% embryos/larvae showing defects of musculature (marked by pig19 enhancer trap)

**odoriferous glands defects** > 1 injected animal showed aberrations of abdominal or thoracic odoriferous glands

**blistered wings phenotype** > 4 injected animals show a total or partial separation of dorsal and ventral wing surfaces

*Note: We developed criteria for selecting datasets with high likelihood of reproducibility for our dataset wide analysis (shown in Figs. 2 and 3). For each phenotype class, we defined specific cut-off values, which were based on our experience gained during the reproduction experiments (e.g. reproducibility, see Figure 1d and Supplementary Figure 1). The main criterion was the penetrance of a phenotype (>50% for most embryonic phenotypes; >2 animals for most phenotypes observed in the injected animals; >80% penetrance for lethality). This main criterion was complemented with other criteria wherever our experience indicated that we would miss a significant number of phenotypes when only applying penetrance.*

**Supplementary Table 4 | *Tribolium* wing-blister genes tested in *Drosophila***

| iB#                                                                           | <i>D.m. ortholog</i>                                  | Driver: | Bbg-GAL4                            | Bx-GAL4                           |
|-------------------------------------------------------------------------------|-------------------------------------------------------|---------|-------------------------------------|-----------------------------------|
| Description of wing phenotype                                                 |                                                       |         |                                     |                                   |
| <b>Annotations associated with wing blister in <i>Drosophila</i></b>          |                                                       |         |                                     |                                   |
| iB_00385                                                                      | <i>Ilk (integrin linked kinase)</i>                   |         | blister                             | crumpled                          |
| iB_05522                                                                      | <i>Asx (additional sex combs)</i>                     |         | WT                                  | blister, curly                    |
| iB_05688                                                                      | <i>wb (wing blister)</i>                              |         | blister                             | blister                           |
| iB_00014                                                                      | <i>parvin</i>                                         |         | blister                             | blister                           |
| <b>Annotations associated with cytoskeleton in <i>Drosophila</i></b>          |                                                       |         |                                     |                                   |
| iB_05272                                                                      | <i>Mob4</i>                                           |         | WT                                  | unable to eclose                  |
| iB_00101                                                                      | <i>TBCB</i>                                           |         | WT                                  | blister                           |
| iB_02017                                                                      | <i>CG32138</i>                                        |         | WT                                  | vein defect                       |
| <b>Annotations associated with cell adhesion in <i>Drosophila</i></b>         |                                                       |         |                                     |                                   |
| iB_01705                                                                      | <i>LanB2 (Laminin B2)</i>                             |         | WT                                  | blister                           |
| iB_01221                                                                      | <i>Cka (Connector of kinase to AP-1)</i>              |         | crumpled                            | wings reduced, blisters<br>unsure |
| iB_01762                                                                      | <i>Pak (PAK-kinase)</i>                               | line 1  | crumpled                            | crumpled                          |
|                                                                               |                                                       | line 2  | WT                                  | WT                                |
|                                                                               |                                                       | line 3  | WT                                  | curly, crumpled                   |
| iB_00557                                                                      | <i>Lar (Leukocyte-antigen-related-like)</i>           |         | crumpled                            | curly, shape, low hatchrate       |
| iB_00666                                                                      | <i>Sra-1 (specifically Rac1-associated protein 1)</i> |         | WT                                  | crumpled                          |
| <b>Annotations without cell adhesion or cytoskeleton in <i>Drosophila</i></b> |                                                       |         |                                     |                                   |
| iB_01726                                                                      | <i>CG11526</i>                                        |         | crumpled, mis-shapen, low hatchrate | wings reduced, blisters<br>unsure |
| iB_02548                                                                      | <i>CG5734</i>                                         |         | WT                                  | WT                                |
| iB_00300                                                                      | <i>plexA (plexin A)</i>                               |         | WT                                  | potential blisters                |
| iB_00499                                                                      | <i>SRPK</i>                                           | line 1  | vein defects                        | vein defects                      |
|                                                                               |                                                       | line 2  | WT                                  | blister                           |
| iB_00907                                                                      | <i>Eip71CD (Ecdysone-induced protein 28/29 kD)</i>    |         | WT                                  | curly                             |
| iB_00845                                                                      | <i>Lrt (Leucine-rich tendon-specific protein)</i>     |         | WT                                  | WT                                |
| iB_04887                                                                      | <i>CG8078</i>                                         |         | WT                                  | blister, low hatchrate            |
| <b>PS integrins as positive controls (not included in iBeetle screen)</b>     |                                                       |         |                                     |                                   |
| -                                                                             | <i>mew (multiple edematous wings)</i>                 |         | WT                                  | blister                           |
| -                                                                             | <i>mys (myospheroid)</i>                              |         | unable to hatch                     | blister, low hatchrate            |
| -                                                                             | <i>if (inflated)</i>                                  |         | WT                                  | WT                                |



**Supplementary Table 5 | *Drosophila* wing blister phenotypes in *Tribolium***

| <b>iB-number</b> | <b>name of <i>Drosophila</i> ortholog</b> | <b>iBeetle phenotype (Injection of L5/6)</b> | <b>Rescreen phenotype (Injection of L7)</b> |
|------------------|-------------------------------------------|----------------------------------------------|---------------------------------------------|
| iB_01796         | <i>papillote</i>                          | larval lethal                                | larval lethal                               |
| iB_01467         | <i>kopupu/shortstop/kakapo</i>            | larval lethal                                | larval lethal                               |
| iB_03871         | <i>blistered</i>                          | larval lethal                                | blistered wings                             |
| iB_05141         | <i>dumpy</i>                              | larval lethal                                | larval lethal                               |
| iB_04642         | <i>piopio</i>                             | larval lethal                                | larval lethal                               |
| iB_05522         | <i>xenicid/additional sex combs</i>       | blistered wings, deformed genital lobe       | -                                           |
| iB_01537         | <i>rhea/talin</i>                         | larval lethal                                | blistered wings                             |
| iB_03691         | <i>delta</i>                              | larval lethal                                | pupal lethality without blistering          |

*Note: The database was screened for genes known to elicit a wing blister phenotype in *Drosophila* (based on Prout et al. 1997 and Walsh and Brown 1998<sup>5,6</sup>). In seven out of eight cases, death prior to wing formation had prevented detection of the blister phenotype (“iBeetle phenotype”). We reasoned that injection at the last larval stage (L7) would reduce lethality and, hence, allow the detection of potential wing blister phenotypes. Indeed, two more genes showed the wing blister phenotype after later injection (“Rescreen phenotype”). In total, three out of eight genes (38%) would have been detected in a screen using systemic RNAi in the last larval stage.*

**Supplementary Table 6 | Workflow of the pupal and larval injection screens**

| <b>Days after injection</b>             | <b>Processing step</b>                                                                        | <b>Phenotypic aspect screened</b>                                                           |
|-----------------------------------------|-----------------------------------------------------------------------------------------------|---------------------------------------------------------------------------------------------|
| <b>Workflow pupal injection screen</b>  |                                                                                               |                                                                                             |
| <b>d0</b>                               | Injection (10 female pupae)                                                                   |                                                                                             |
| <b>d3</b>                               | Inspection of adults                                                                          | Metamorphosis control                                                                       |
| <b>d3-9</b>                             | 1 <sup>st</sup> egg collection                                                                |                                                                                             |
| <b>d9</b>                               | Inspection of adults                                                                          | Lethality of injected animals                                                               |
| <b>d9-11</b>                            | 2 <sup>nd</sup> egg collection                                                                |                                                                                             |
| <b>d11</b>                              | Assessment number of eggs in 2 <sup>nd</sup> collection                                       | Egg productivity                                                                            |
| <b>d13</b>                              | L1 cuticle preparation<br>(based on 1 <sup>st</sup> egg collection)<br>Dissection of ovaries* | Ovary morphology*                                                                           |
| <b>d14</b>                              | Muscle preparation<br>(based on 2 <sup>nd</sup> egg collection)                               | L1 somatic muscles                                                                          |
| <b>d27-32</b>                           |                                                                                               | L1 cuticle morphology#                                                                      |
| <b>Workflow larval injection screen</b> |                                                                                               |                                                                                             |
| <b>d0</b>                               | Injection (10 female larvae)                                                                  |                                                                                             |
| <b>d11</b>                              | Inspection of pupae                                                                           | Lethality of injected animals<br>Metamorphosis control<br>Pupal morphology<br>Pupal muscles |
| <b>d16/18</b>                           | Inspection of adults                                                                          | Metamorphosis control<br>Adult morphology<br>Melanization                                   |
| <b>d20-23</b>                           | Egg collection                                                                                |                                                                                             |
| <b>d21-25</b>                           | Assessment number of eggs<br>Dissection ovaries*                                              | Egg productivity<br>Ovary morphology*                                                       |
| <b>d38-41</b>                           | Analysis stink glands#                                                                        | Altered or missing stink glands                                                             |

\*If number of eggs was reduced in second egg collection      #Exact timing not critical

**Supplementary Table 7 | Sequences of the dsRNA fragments used for the analysis of selected genes**

| <b>iB-number</b> | <b>iB-fragment</b>                                                                                                                                                                                                                                                                                                                                                                                                                                                                                                                                                                                              | <b>Non-overlapping fragment</b>                                                                                                                                                                                                                                                                                                                                                                                                                                                                                                                                                                                                                               |
|------------------|-----------------------------------------------------------------------------------------------------------------------------------------------------------------------------------------------------------------------------------------------------------------------------------------------------------------------------------------------------------------------------------------------------------------------------------------------------------------------------------------------------------------------------------------------------------------------------------------------------------------|---------------------------------------------------------------------------------------------------------------------------------------------------------------------------------------------------------------------------------------------------------------------------------------------------------------------------------------------------------------------------------------------------------------------------------------------------------------------------------------------------------------------------------------------------------------------------------------------------------------------------------------------------------------|
| iB_05549         | AGCACCAGACCCAGAACAACAACAACAATACCAAAATCGAAAAAC<br>ATGGAGCGGGTCAAACGGCCATGAACGCCTTCATGGTGTGGTTCGCG<br>GGCCAGCGGGCGAAAATGGCCAGGAAAACCCAAAATGCACAATT<br>CGGAAATCTCGAAGCGGCTGGGGCCGAGTGAAGCTGTTGAGTGA<br>GGCCGAGAAGCGGCCCTTCATCGACGAGGCAAGCGGCTGAGGGCC<br>GTGCACATGAAGGAACCCGGATTACAAGTACCGGCTAGGAGGAA<br>GACCAAGACGCTCTGAAGAAGGATAAATATCCCTGGGAGCGTCCA<br>GCTTGATCCCGACTAGTACCCGACGCGGACGCGCCTTCGCGGTC<br>CAACAGGTGTCCAGCCGGGACATGTACCAGATGCCAATGGGTACAT<br>GCCAACGGGTACATGATGCACGACCCCGGGGCTACCAGCAGCAGT<br>ACACCGGTTCCAATACGGCCGCTACGACATGTCGAAAATGCAGTACA<br>TGAACGGTTACGGTTACGG                                 | ACCAAGACGCTCCTGAAGAAGGATAAATATCCCTGGGAGCGTCCA<br>GCTTGATCCCGACTAGTGACCCGACGCGGACGGCGCCTTCGCGGT<br>CCAACAGGTGTCCAGCCGGGACATGTACCAGATGCCAATGGGTAC<br>ATGCCAACGGGTACATGATGCACGACCCCGGGGCTACCAGCAGC<br>AGTACACCGGGTCCAATACGCGGCTACGACATGTCCAAATGCA<br>GTACATGAACGGTTACGGTTACGGGGCCACCGTGCCCCAGAGTGCA<br>GGCTCCCCCTACGGAATGCAACAGACGCTGTCGCATAGCCCCTCG<br>GGTCCAGTATAAAATCGGAGCCGGTTTCCGAGATTCGGGGCTGCA<br>CACACCGACCCGGGCTCAAGCGGGAGTACGGCCAACAGCAGCA<br>GCCCCAGGGGACTGCGACAGATGATCTCCATGTACTGCCAAC                                                                                                                                                               |
| iB_05264         | AAGGGCTACTGGGGTTTACCCGGCGATTACAAGATTTCAAACAAA<br>CAATCCCGATATTAAGTCAAGACGGCACTTACTATTAACAATATC<br>CAGAAAACAAACGAGGGTTATTATTTATGTGAGGCTGTCAATGGGATT<br>GGATCAGGATTATCTGCAGTATTCAAATCAGTGTCAAGCTCCCCAC<br>AGTTTGATATTAAGTCAAGAACCAACCTCCCGCGTGGAGACCTG<br>CCGTCTCCAATGTGAGGCCAAAGGCGAAAAACCGATTGGTATTTTAT<br>GGAATATCAACAATAAGCGTTTGAACCAAAAGGCGACAATAGATAC<br>ACGATCCGGGAGGAGATCCTCGCAATGGTGTCTTCCGCGCTCAGT<br>ATCAAACGCACAGAAGCTCCGACTCCGCTCTTTACTTGTGTAGTCA<br>CAAACCGCTTCGGCAGTGACGATACCAGCAATTAACATGATTGTGCAAG<br>AAGTACCAGAGGTACCATACGGGCTGAA                                                               | AAGGGCTACTGGGGTTTACCCGGCGATTACAAGATTTCAAACCA<br>AACAAATCCCGATATTAAGTCAAGACGGCACTTACTATTAACA<br>TATCCAGAAAACAAACGAGGGTTATTATTTATGTGAGGCTGTCAAT<br>GGGATGGATCAGGATTATCTGCAGTATTCAAATCAGTGTTCAG<br>CTCCCCACAGTTTGTATTAACACTCAGGAACCAACCTCCCGCGT<br>GGAGACCTGCCGTCTCCAATGTGAGGCCAAAGGCGAAAAACCG<br>ATTGGTATTTTATGGAATATCAACAATAAGCGTTTGAACCAAAAG<br>GCGACAATAGATACAGATCCGGGAGGAGATCCTCGCAATGGTG<br>TTCTTCCGCGCTCAGTATCAAACGCACAGAAGCTCCGACTCCGCT<br>CTCTTTACTTGTGTAGCTACCAACGCTTCGGCAGTACGATACCAG<br>CATTACATGATTGTGCAAGAAGTACCAGAGGTACCATACGGGCTG<br>AA                                                                                                          |
| iB_04564         | CGTCTACAGCATCGACCAGATTTGGGAGTTAACAGCTCGTCCACCTCT<br>GCGAAGAGCATCGAAGGCGAGTCCGATTCCAAAGTTCGATTCCGGTCA<br>TGATAGCGAAATGGTTGAGGAAAGCATCGAAGATTTGAACGACACCA<br>GACCGAGAAAAATCCGCAGATCCCGAACGACTTCCACCACTATCAGC<br>TGACCAACTGGAGCGAGCTTTCGAAAAACCAATACCCCGACGTTT<br>TCACAAGAGAGGAATTGGCTATGCGGCTTGATTGAGCGAAGCGCGA<br>GTCCAGGTATGGTTCCAAAACCTCGCGCAAGTGAGAAAGCGTGA<br>AAAGG                                                                                                                                                                                                                                          | CGTCTTCTGTGCAATACGTGCTCGAGGCGGGCTCCCCAACTGA<br>ATCTCTAAATAGTGGGATTCCGGACGAAACGGTCCCGGAGTACGAG<br>TCCGGAACCTCCAGTCCGTCGAGTTGTCGCCCTCAGCGCTGGAA<br>GCTTTGAGGTTACGGACACAAGAAATTTAGTCCGAGTTCCTCGCC<br>GCAGAACTGCACGCGAAGTCGTAATAGATAATCTAGTGGACA<br>TGTAGTTGATTGTTAGGGATGTAGGAGATTATGGCGCTTGATAT<br>GTGGGGGAAATAGACTGAATAGCTGTACCAAGTTTTCGATTTAGTT<br>GTTATTTTTTTTCTTCTTATGATAGGGAGAATTATTTTGTATTA<br>ATTTATTTACAACACTAGTTGCACTAGTTAGTTAGCCCAATTTTGT<br>AAATAATTTTGTACATAAAGTGCATTTTATTTATTTAGATAAAAA<br>ATCAAGAGGTTTGTAAAACATAATAGCATTACAGATAAATTTTT<br>GTGGGGGAAATTAACAATAAGTTGTACCTAATACCTAGTTACGATC<br>GATATTAACGAAACAATAAATAAACCGGACGGTGTCTTACTTGTCT<br>TGGT |
| iB_00289         | TCAGAGTGCAGAAATGCTGATGCCAGTGGACTTCCGGCCAACGAGG<br>CCGATGGTCTTGGACTCGGAGGCTGGGACGAAACAAACACCAAC<br>AACGGAGTGCAGATAAAGACACCAGTACGACCAACTGTTGCGTGGG<br>TGACTGCCGTATCACACCAGGATCAGTCCGTAAGAGAACAATTTTTC<br>GGTTTATGGGAAATCGAAGAAGCGGTGGTTCATCTGATAGACAAA<br>CGGGGAAAAGTCCAGGATATGATTGTAATTTATGGGAGATAAAGTCT<br>TCATCAGATAGAGCATGTAAGAGCGCTAACCCATTATTGACGGGCGA<br>AAAGCGAATGTGAATTTAGCGATTCTGGGAGCGAAACCGAGAGGAAA<br>TGCAGCAACGGGTTTCCCGTTTCAAGGAATCCGGGCTGGTTATCCTGC<br>ACTTCTTCCGGGCCAGTACGGAATGCCTCCTGTTATGTGTACCAATCT<br>CCATACCTAAGTCTGCTGCTCCTGGAAGTCT                                                        | CGCTAACCCATTATTGACGGGCGAAAAGCGAATGTGAATTTAGCG<br>ATTCTGGGAGCGAAACCGAGAGGAAATGCGCAAACGGGTTTCCCG<br>TTTCAAGGAATCCGGCTGGTTATCCTGCACTTCTCCGGGCGCAGTA<br>CGGAATGCCTCCTGGTTATGTGTACCAATCTCCATACCTAAGTGTG<br>CTGCTCCTGGAAGTCTT                                                                                                                                                                                                                                                                                                                                                                                                                                       |
| iB_00555         | GCTGATTGC ATTCTCAA CAAGCGTA GTCGGTGCC GGGGCAAT<br>CAGTTGGTT TTGAGTTAC TTGAGACAC TCCTTGAGC GCCCAGTTA<br>GTCTCATAT GCGGCTGTG CTTCAACGC CTCAGCAA TACAACCA<br>CTCAGTAAA GTCCACTGC GTGTTTAGC CTACTTGAG TTCCTGAA<br>GGCATGCTT CCGGGTGT ACTTGTGT GGCAAACCG GAAGAAAC<br>GCTCTGGC ACTGCAAT TTATCAAT GCTTGTGG CTCCTGACT<br>ATTTTATTG CAATGCAA GGCACCCT CATTGACT CAGAAAGCC<br>TCGTTCTTG CTCACCAG CTCATGAAT GACGATTTT TACGTCTCC<br>ATGATGTGT CTAGCGAGG TACAGCGAT CCTGAATTG TTTACTGAG<br>ACCAACCGC AAATGTATT GAGTTGAGG GCGTCGTTG TCCGATTCT<br>GACGAGTTA TCTAAATGC GTTAAAAA CTGAAAAAC ATCGATGTT<br>AACATTTG AGCCTCCG ATCAATAG | TGCAGAGAGGTGTGGATCTGGCTTTGGCGGCTTCCATGTCGATAT<br>CAGGGCCTGCATTTGGAGTGTCTCGCATGTTTTGCCCAAAATGT<br>TGTATAACGATCTCAAGCGGACTCGCTCATGGAGCCGATTTGATC<br>GCATTGGCTTACTTGACCAGTATTGCGGTGTACACGGCCTTTGATC<br>GTTTTCGGAAGAACCAGGAAACCGGATGGCTAAAGTTGCGCGGCTT<br>AATGAGGGTGGAGTGGAGTGGCAGCTGATTGAGCAACTAATTTGACTC<br>TCAGACAACTGATGACGATTTTTGAGGATGGGATACAAGAGGGTTA<br>CATCACTCAACAGACTTATTTGCGTTTTATTTGATTAAGTCTGGT<br>TGAGGTGAAAGTGAACGCGGAGTGTCTCTTGGCTGCGATTCCG<br>CCGGCTCTGTGACAGACTTGTCTGGACTGCTGCACTTTTAC<br>TTACCGATTTTGTGATCTGCAGATGTGTTAATACTCACGGTC<br>GGAATAACATGGCAAAGGACTTGTGATTTGCGAAATTAACCACTT<br>GAGGAACGTTTCG                                         |
| iB_04537         | TCATGCAGAAACGGGGTACTCCGATCAATCGACTGCCATCATGGCCA<br>AATCCGTTCTCGATTTATACGAATTTGACAATTTAGTCATCGCGAGGG<br>GTGGACTTGTGATGTCAATAAGAACTCTGGCAGGAAATATCA<br>AAGGGCTGCATCTACCGTGTGATCAACGTCGGCAGCTTTCAACATCA<br>GGACGCAATACATGAAATACCTGTACCTTACGAATGCGAGAAACGCG<br>GCCTCAGCACACCGCCGAGCTCCAGGCGCCATCGACGGCAACCGT                                                                                                                                                                                                                                                                                                        | CGCATGATGGAATACGTCAGCTCCTCAACAAGGAAATCCGAGCT<br>CGGCGGCTACTCCGCCACGCAAGGGGACGTGTGCGCCCTAACCG<br>CACTCGCCACTCAACGAGTGGAGCTGTGCGGATAACGCTCTGG<br>AATATGTACAATAAATAACACCCCGCTCGAGCCGCAAAAGGAAAG<br>CGTTGAATCTCTCCGACCCGACGCGCTTCGGTGAACCGGGAGCC<br>GGAGCATAGAGATTGCCACCGCCCGGAAAGTTTTCCAAGAT                                                                                                                                                                                                                                                                                                                                                                     |

|          |                                                                                                                                                                                                                                                                                                                                                                                                                                                                                                                                                        |                                                                                                                                                                                                                                                                                                                                                                                                                                                                                                                                                                                                                                                             |
|----------|--------------------------------------------------------------------------------------------------------------------------------------------------------------------------------------------------------------------------------------------------------------------------------------------------------------------------------------------------------------------------------------------------------------------------------------------------------------------------------------------------------------------------------------------------------|-------------------------------------------------------------------------------------------------------------------------------------------------------------------------------------------------------------------------------------------------------------------------------------------------------------------------------------------------------------------------------------------------------------------------------------------------------------------------------------------------------------------------------------------------------------------------------------------------------------------------------------------------------------|
|          | CGGAAGGCCGCCGAGCAGCTACGGCCAGTACGACTCCATGCAGCG<br>CTCCCCAACCCCTTCGCAGATGTCTCTTTGTCCCTCGTC                                                                                                                                                                                                                                                                                                                                                                                                                                                               | GATGATGAACAGAAGATCTCGCCC                                                                                                                                                                                                                                                                                                                                                                                                                                                                                                                                                                                                                                    |
| iB_02517 | TCACTCAAAGCCACAGATGCGGTTTTAGTAAAATTGGGGCCCAAGGG<br>CGAAATTTCAAATGAGACACTTGTTCAGCTCGATTTGGTGAACGTGG<br>GGATGTTTTAAAAGTGGTACCGGGGGCCAAAGTACCACTGCAGCGCA<br>AAGTTTTACAGGGCCAATCAATGTGCGACGAGAGCCTCATAACTGGG<br>GAAAGCATGCCGTACCGAAGAAAATCACAAGTAGTGTGATTGGTGG<br>ATCAATCAATCAGCACGGCTACTTATAATCGAAGCCACACATACAGG<br>AGAGGCAACAACCCATCACAATTGTCAAATTGGTGAAGAAGCACAA<br>AACGTCAAAGACCCATCCAACAATTGGCCGATAAAAATCGCTGGTTA<br>TTTCGTCCTCAACTGTCTCTTCTGTCACTTTTGACACTTATTGTCTGGT<br>CTATTATCGGCTCAATCGATATAAACGCACCTTCGGTGAC                                    | CCCCACAGGCGACTACACCTCCGACCAACCAATAATCACAGTG<br>TCAGAAGATGACACGATTAATAACACCTGCTTGGGATGACGTGCC<br>AAAGCTGTGTCAAAAACATCGAAGAGACCTGAGTCGTAAACCCGG<br>CATTTACAACATCAAAGTCAAGCTTCAGGAAAAAGCCGCTCTAGTCC<br>ATTATGACACACGCCAACTGACA                                                                                                                                                                                                                                                                                                                                                                                                                                 |
| iB_04887 | GGTGCCAAAGACTCCACAGTTCTGGCGTACGTCATGAAGCTACTTAA<br>GAAAAGTACGATTATAAGCTGGACTTAGTGCTTTTGTCCATTGATGAG<br>GGTATTACAGGGTACAGGGACGATAGTTAGATACTGTGAACAAAA<br>TCGGGACGATTACGGAATGCCCTTTGAAAATAATGTCTTATAAGGATTT<br>GTACGGTTGGACAATGGACGAAATTTGGCTGAGATTGGGAGGAAA<br>AATAACTGTACTTTTTGTGGCGTTTTAGACGCGCCAGGCTTAGACAGA<br>GGGGCGGCTCTTCTAAATGTTGATTATTTAGCAACTGGACATAACGCT<br>GATGATATTGCAGAGACTGTCTTGTATGAATATTTAAGGGCGGATTTG<br>GCACGCTCAGCCGTTGTACGTCCATTATCACGACAGTGGTGACGGC<br>ATTCCACGCGTAAAACCCCTCAAATACACCTACGAGAAAAGAAATCGTC<br>ATGTACGCT             | TCTCCACTGAGTGTCTTCGCCCAATGCGTACAGAGGCCATGCC<br>CGGGTGTGCTCAAAGATTTGGAAAAATAGACCCTGCTGTTATAA<br>TGAATATTATCCAGTCGGGGGAATCCCTCAAATCAACGAAAATGC<br>CAATATGCCAACCTTTGCAGAAAATGCACAAGGTGCGGATATGTGTCTG<br>TCGACGAGCGTGTGCAAAGCTTGCCTCTCTTGGAGGGACTCAATA<br>AAGGATTACCGAAAAGTGAAGTAGGGAAGTGCAGTAAAGTGAAC<br>GACATTTACAAGAAAACAGTCCGTTGTGAAAACGC                                                                                                                                                                                                                                                                                                                   |
| iB_05264 | AAGGGCTACTGGGGTTTACCCGCGGATTACAAGATTTCAAACCAAA<br>CAATCCCGATATTAAGTCAAGACGGCACTTACTATTAACAATATC<br>CAGAAAAACAACGAGGGTTATTTATGTGAGGCTGTCAATGGGATT<br>GGATCAGGATTATCTGCAGTTATCAAATCAAGTTCAGCTCCCCAC<br>AGTTTGATATTAACCTCAGGAACCAACCTCCGCGGTGGAGACCTG<br>CCGTCTCCAATGTGAGGCCAAAGGCGAAAAACCGATTGGTATTTAT<br>GGAATATCAACAATAAGCGTTTGAACCAAAAGGCGACAATAGATAC<br>ACGATCCGGGAGGAGATCCTCGCAATGGTGTCTTTCCGGCCTCAGT<br>ATCAAACGCACAGAACGCTCCGACTCCGCTCTTTACTTGTGTAGCTA<br>CCAACGCTTCGGCAGTGACGATACCAGCATTACATGATTGTGCAAG<br>AAGTACCAGAGTACCATACGGGCTGAA           | GTTTTGGGTTACCGCAGCTACCACTATTGGAGAAGGGCAACCGTGC<br>AAGAAAAGTACAGTGTCTCAAAGCGCGAGCGTTCCAGCCAAAATCG<br>CCTCGTTTACGATACCTTACCACGACGTACAAGGAAGACGTGAC<br>TCTCCCTTGCCTCGCCGTTGGGTTGCCACCACCGGTATCACATGGA<br>AAATCAAGGGGGTTCAGTTCACCACAAGCGACAAAATCAGGCAACA<br>ACCAGACGGGCTCACTGTTTATTGATGATGTCAGTCGGAATAACGCA<br>GGGGAGTACTCGTGTACGTTGAGAATGACTATGGACAGGACTCG<br>GTGACTCACCAGTGTATTGTCAATGCTCTCCACACGACCAACAAAT<br>GTCTCACTTCACTACCACAAAATTCGCTCAGCTTTAAGTTAAAGCC<br>GCATGAGTCGGATGTTGAGCCGATCCATGGATACTATTCACTAC<br>AAGCCAGAGTTTGGCGATTGGGAGACGGTCCAGATTGGACCAACT<br>GTCGAAAAGTACACTTTGGAGAAGTTGCTGTGTGG                                                         |
| iB_04564 | CGTCTACAGCATCGACCAGATTTGGGAGTTAACAGCTCGTCCACCTCT<br>CGGAAGAGCATCGAAGCGAGTCGGATTCAAAGTTCGATTCCGTCAG<br>TGATAGCGAAATGGTTGAGGAAAGCATCGAAGATTTGAACGACACCA<br>GACCGAGAAAAATCCGAGATCCCGAACGACTTTCACCACCTATCAGC<br>TGCACCAACTGGAGCGAGCTTTGAAAAAACCAATACCCCGACGTTT<br>TCACAAGAGAGAAATTGGCTATGCGGCTTGATTTGAGCGAAGCGCGA<br>GTCCAGGTATGGTTCAAACCGTCCGCGCAAGTGGAGAAAAGCGTGA<br>AAAGG                                                                                                                                                                               | CGTTTTCTGTGCAAACTAGTGTCTGCGAGCGCGCTCCCCCACTGA<br>ATCTCTAAATAGTGGGATTCGGACGCAAGCGTCCGGAGTACGAG<br>TCCGGAAAATCCAGTCCGTCGCAAGTTGTCCCTCAGCGCTGGAA<br>GCTTTGAGGTTACGGACACAAGAAATTTAGTCCGAGTTCCTCGCC<br>GCAGAACTGCACGCGAAGTGTAAATAGATAATATAGTGGACA<br>TGTAGTTGATTGTTAGGGATGTAGGAGATTATGGCGCTTGATAT<br>GTGGGGGAAATAGACTGAATAGCTGTACCAAGTTTTCGATTTAGTT<br>GTTATTTTTTTTTTCTTCTATGATAGGGAGAATTTTTGTATTAA<br>ATTTATTTACAACACTAGTTGCACTAGTTAGTTAGCGCAATTTTGT<br>AAATAATTTGTACATAAAGTGGTATTTATTTAGTAGATAAAAA<br>ATCAAGAGGTTTGTAAAACATAAATAGCATTACAGATAAATTTTT<br>GTGGGGGAAATTAACAATAAGTTGTACCTAATACCTAGTTACGATC<br>GATATTAACGAAAACAATAATTAACCGCAGGTGTTTTACTTGTCT<br>TGGT |
| iB_00289 | TCAGAGTGCAGAAAATGCTGATGCCAGTGGACTTCCGGCCAAACGAGG<br>CCGATGGTCTTGGACTCGGAGGCTGGGCACGAAACACAACCAAC<br>AACGGAGTGCAGCATAAGGACACCACATGGACCAACTGTTCTGTTGG<br>TGGACTGCCGTATCACACCAGGATCAGTCGCTAAGAGAATTTTTT<br>GGTTTTATGGGAAATCGAAGAAGCGGTGGTCACTGATAGACAAA<br>CGGGGAAAAGTTCGAGGATATGGATTGTAATTATGGGAGATAAGTCT<br>TCATCAGATAGAGCATGTAAGAGCGCTAACCCATTATTGACGGGCGA<br>AAAGCGAATGTGAATTTAGCGATTCTGGGAGCGAAACCGAGAGAAA<br>TGCGCAAACGGGTTTTCCGTTTCAAGGAATCCGGGCTGGTTATCCTGC<br>ACTTCTCCGGGCCAGTACGGAATGCCTCCTGTTATGTGTACCAATCT<br>CCATACTAACTGCTGCTGCTCCTGGAAGTCT | GGAGCACCTTCAACAAAGAGTACATAAACACAGTGGTTAACCCCT<br>CGGAAACCGGCCACCAGACCAACGAAAACCACTACCACCTCC<br>TCGGAGCGTTCCGACGCTTCTGATCCTTCTGAAGATCAGAGTGCGA<br>AAATGCTGATGCCAGTGGACTTCCGGCCAACGAGGCCGATGGTCT<br>TGGACTCGGAGGCTGGGCACGAAACACAAAACCAACACGAGT<br>GCAGCATAAGGACACCACATGGACCAACTGTTCTGTTGGTGGACT<br>GCCGTATCACACCAGGATCAGCGCTAACCCATTATTGACGGGCG<br>AAAAGCGAATGTGAATTTAGCGATTCTGGGAGCGAAACCGAGAGG<br>AAATGCGCAAACGGGTTTTCCGTTTTCAAGGAATCCGGGCTGGTTAT<br>CCTGCACCTTCCGGGCCAGTACGGAATGCCTCCTGTTATGTGTGA<br>CCAATCTCCATACTAACTGCTGCTGCTCCTGGAAGTCTT                                                                                                               |
| iB_04887 | GGTGCCAAAGACTCCACAGTTCTGGCGTACGTCATGAAGCTACTTAA<br>GAAAAGTACGATTATAAGCTGGACTTAGTGCTTTTGTCCATTGATGAG<br>GGTATTACAGGGTACAGGGACGATAGTTAGATACTGTGAACAAAA<br>TCGGGACGATTACGGAATGCCCTTTGAAAATAATGTCTTATAAGGATTT<br>GTACGGTTGGACAATGGACGAAATTTGGCTGAGATTGGGAGGAAA<br>AATAACTGTACTTTTTGTGGCGTTTTAGACGCGCCAGGCTTAGACAGA<br>GGGGCGGCTCTTCTAAATGTTGATTATTTAGCAACTGGACATAACGCT<br>GATGATATTGCAGAGACTGTCTTGTATGAATATTTAAGGGCGATTTG<br>GCACGCTCAGCCGTTGTACGTCCATTATCACGACAGTGGTGACGGC<br>ATTCCACGCGTAAAACCCCTCAAATACACCTACGAGAAAAGAAATCGTC<br>ATGTACGCT              | TCTCCACTGAGTGTCTTCGCCCAATGCGTACAGAGGCCATGCC<br>CGGGTGTGCTCAAAGATTTGGAAAAATAGACCCTGCTGTTATAA<br>TGAATATTATCCAGTCGGGGGAATCCCTCAAATCAACGAAAATGC<br>CAATATGCCAACCTTTGCAGAAAATGCACAAGGTGCGGATATGTGTCTG<br>TCGACGAGCGTGTGCAAAGCTTGCCTCTTGGAGGGACTCAATA<br>AAGGATTACCGAAAAGTGAAGTAGGGAAGTGCAGTAAAGTGAAC<br>GACATTTACAAGAAAACAGTCCGTTGTGAAAACGC                                                                                                                                                                                                                                                                                                                     |

**Supplementary Table 8 | Comparison of number of lethal genes**

| <i>Drosophila</i>                          |                  |                             |  |                       |
|--------------------------------------------|------------------|-----------------------------|--|-----------------------|
|                                            | Absolute numbers | % related to ...            |  | Reference             |
| Protein coding genes                       | 13,918           | ...all genes:               |  | FlyBase; Release 6.02 |
| Lethal loci                                | 5,000            | 35.9%                       |  | Nüsslein-Volhard 1994 |
| Sterile loci                               | 1,000            | 7.2%                        |  | Nüsslein-Volhard 1994 |
| Essential genes (sum lethal plus sterile)  | 6,000            | 43.1%                       |  | Nüsslein-Volhard 1994 |
|                                            |                  | ... lethal genes:           |  |                       |
| Embryonic lethal genes                     | 1,000            | 20.0%                       |  | Mullins et al. 1994   |
|                                            |                  | ... embryonic lethal genes: |  |                       |
| Embryonic lethal without cuticle phenotype |                  | 85.0%                       |  | Mullins et al. 1994   |
| ...with phenotype                          |                  | 15.0%                       |  |                       |

| <i>Tribolium</i>                |                             |                                                  |                                       |                  |
|---------------------------------|-----------------------------|--------------------------------------------------|---------------------------------------|------------------|
|                                 | Numbers found in the screen | Numbers corrected for false positive rate of 26% | % of corrected numbers related to ... | Reference        |
| All analyzed genes              | 3,400                       |                                                  | ... all analyzed genes                |                  |
| Lethal genes                    | 1,686                       | 1,248                                            | 36.7%                                 | Fig. 2b, heading |
| Non-lethal genes with phenotype | 229                         | 169                                              | 5%                                    | Fig. 2a          |
|                                 |                             |                                                  | ... all lethal genes                  |                  |
| Embryonic lethal genes          | 969                         | 717                                              | 57.5%                                 |                  |
|                                 |                             |                                                  | ... embryonic lethal genes            |                  |
| No cuticle defect               | 186                         | 138                                              | 19.2%                                 |                  |
| With cuticle defect & empty egg | 783                         | 579                                              | 80.8%                                 |                  |

## Supplementary Note 1

### Detailed information on positive controls

In order to assess reliability and sensitivity of our screen, and to test the alertness of the screeners, we included 41 different positive controls. The screeners did not know which gene was used as positive control in a given repetition, whether this control had a phenotype in the pupal or the larval screen, and due to the high number of different controls, a screener would encounter most controls only once during the screen. However, for technical reasons in the production pipeline, it was not possible to hide the position of positive controls within a repetition. Hence, with some effort, a screener could identify the position of the positive control and scrutinize it more carefully (see details below). As an additional way assessing reliability and sensitivity of the screen, we searched for datasets that by chance had targeted genes with known phenotypes. The identities of these genes were neither known to the screeners nor the PIs such that these datasets represent double blind positive controls (see details below). We observed similar recognition rates as in the added positive controls (see Fig. 1a and b).

It turned out that in our procedure, the phenotypes of some positive controls were reproducibly different from the published phenotypes and novel phenotypic aspects were detected (e.g. due to different dsRNA concentration or different injection stage and timing). Therefore, the entire iBeetle procedure was performed with all positive controls in order to define the phenotypic aspects that had to be recognized in our screen.

In 370 cases (93.2%, n=397) the phenotype was entirely (83.3%) or partially (9.8%) recognized (dark and light green; Supplementary Figure 1). Controls were regarded as “partially recognized” when the majority (but not all) of the aspects of a phenotype were correctly annotated.

Most of the 39 cases that were only partially recognized were derived from five positive control genes. These genes had originally been chosen for controlling the pupal injection screen but turned out to have phenotypes in the larval screen as well (*Tc-vestigial*, *Tc-hedgehog*, *Tc-wnt-less/evi* and *Tc-TGF-alpha*; see controls marked with a diamond in Supplementary Figure 1). We scored them as “partially recognized” when at least three out of four aspects were recognized. Four additional cases of partially recognized controls stem from *Tc-metoprene tolerant* (*Tc-met*), where the lethality of the injected animals was properly annotated but the necrotic head was missed.

With respect to “technical lethality”, in 11 cases (2.8%) the premature death of the injected animals prevented detection of the phenotype (Supplementary Figure 1, light blue). 16 cases were true false negatives (4%; Supplementary Figure 1, dark blue). 62.5% of those cases derived from the analysis of only three positive control genes that elicited subtle morphological defects in the adults, like slightly deformed cuticular structures at the ventral midline of adult beetles after larval *Tc-orthodenticle* RNAi (missed five times), or minor head or leg defects after pupal injections of *Tc-methoprene-tolerant* or *Tc-aristaless* (together five cases).

We analyzed 65 datasets that by chance had targeted genes with previously described phenotypes (

Supplementary Table 2). Hence, this set represents completely blind positive controls. 51 of those (78.5%) were recognized with the previously published phenotype.

In eleven cases (16.9%), we found a phenotype which was reproducibly different from the published one (i.e. reproduced in an independent repetition of the experiment following our screening procedure). Hence, the phenotype differed due to our specific experimental conditions, not due to experimental variation. The relevant parameters responsible for such differing phenotypes could be the different stage and timing of injection, the genetic background of the injected animals and the different dsRNA fragment used for the experiments.

We observed several cases where the RNAi phenotypes were reproducibly different from published data. One case is likely due to strain specific differences: The larval injection of two different fragments against *Tc-empty spiracles* (iB\_05098 and a positive control fragment) reproducibly elicited different phenotypes in two different strains. In case of *Tc-odd-skipped* (iB\_04013) the difference could be either strain specific or due to different dsRNA concentrations. Larval injection of the iB-fragment in L6 or L7 larvae did not lead to any phenotype in the screen, although defects of mouthparts, antennae and legs had been described previously<sup>7-9</sup>. However, in our hands, neither the iB-fragment nor a non-overlapping fragment, either in the screening strain or in another genetic background, reproduced the published phenotype. In three cases, different dsRNA concentrations are likely to be responsible. For both, iB\_03691 (*Tc-delta*) and iB\_04526 (*Tc-homothorax*), lethality was observed in the screen. This was reproduced by injection into later stages and by using a non-overlapping fragment in another genetic background. In the publications, the authors mention using diluted dsRNA solutions in order to see the phenotype. Hence, it is likely that the higher concentrations of dsRNA used in the iBeetle screen caused the stronger phenotype. Pupal dsRNA injections targeting *Tc-decapentaplegic* (*Tc-dpp*) always led to lethality or cachexia (starved animals) in our screen and in follow-up experiments with two different fragments in two different strains. This is in contrast to the published results<sup>10,11</sup> but is in line with the recent finding that *Tc-dpp* is also involved in lipid homeostasis<sup>12</sup>.

The timing of injection was critical for iB\_01701, which targets *Tc-laccase-2*. The expected phenotype was annotated neither in the pupal nor the larval injection screen. Injection into L6 larvae reproducibly led to early lethality instead of the published tanning defect (i.e. pupae with soft and non-pigmented cuticle) while in the pupal screen, no effect was seen. An independent injection of the same fragment into older (L7) larvae did reproduce the published phenotype.

In four cases, either isoform-specific knock down, or off target effects likely led to different phenotypes. *Tc-knirps*, *Tc-frizzled-1* and *Tc-lim-1* were annotated with the “empty egg phenotype” instead of the published morphological defects<sup>13-15</sup>. These results were reproduced using the iBeetle fragment but non-overlapping fragments produced the published phenotype (*Tc-knirps* and *Tc-frizzled-1*) or wildtype larvae (*Tc-lim-1*). Pupal injection of an iB-fragment against *Tc-broad-complex* (*Tc-BRC*, iB\_03960) did not reveal any defect, while injection of another fragment of *Tc-BRC* (used as a positive control) consistently led to various strong defects during embryogenesis. Our follow-up analysis indicates that off target effects are the most likely explanation: In the case of *Tc-BRC*, several splice variants with distinct functions are known for *Drosophila* and *Tribolium* and indeed, the two dsRNA fragments target different isoforms: The positive control fragment (335 bp) lies in the common fourth exon of the *Tc-BRC* isoforms as published by Konopova and Jindra (2008)<sup>16</sup> and leads to a range of embryonic developmental defects. iB\_03960 (495 bp) does not overlap with the positive control fragment, but spans the 3' end of common exon 4, common exon 5 (adding up to 321 bp) and part of the alternatively spliced exon 6 of splice isoform Z4 (174 bp). iB\_03960 does not lead to any embryonic defects. Due to the fact that both fragments are predicted to target all isoforms, an off target effect of the positive control fragment appears likely. Previous studies using an insertion mutant have shown no or no severe degree of embryonic

lethality. Due to the location of the insertion in the region of alternatively spliced exons it remains unclear what isoforms are actually affected in this mutant<sup>16</sup>.

For *Tc-fz1* and *Tc-kni* we checked the most recent annotations of the *Tribolium* and *Drosophila* genomes and the *Tribolium* literature for indication of alternative transcripts. There are no published splice isoforms for *Tc-fz1* and off target analysis did not reveal any putative off target hit using the e-RNAi resource<sup>17</sup>. For *Tc-kni* there are two small 5' introns present in the automatically annotated gene model (TC003413), but not in the published mRNA sequences, which are based on RACE and cDNA sequences<sup>14</sup> (NM\_001128495). Anyway, the iBeetle fragment targeting *Tc-knirps* is downstream of this questionable region. Off-target analysis revealed several hits in other genes two of which showed a phenotype in the screen.

One out of 65 phenotypes was overlooked (1.5%) and two were missed for technical reasons (3%). It is a bit surprising that the portion of missed phenotypes of this completely blind set of controls is even lower than the one with the set of not completely blind positive controls. The reason could be that we deliberately included subtle (partly unpublished) aspects of phenotypes as positive controls while the set of published phenotypes may be biased towards strong phenotypes.

Several RNAi phenotypes were missed. Subtle tarsal and antennal defects after *Tc-bric-a-brac* (iB\_03591) larval RNAi were not detected in the screen but we were able to elicit this phenotype by repeating the experiment (with the iBeetle fragment). In two cases, technical lethality (e.g. due to injection problems) led to precocious death of the injected animals, which prohibited detection of the later phenotype (*Tc-pumilio* (iB\_03898) and *Tc-methoprene-tolerant* (iB\_03648)).

## **Negative controls**

The last injection of each injection day was either a positive control or a buffer injection (blind to the screener). We used these buffer injections to assess the rate of false negative annotations: Four out of 155 buffer controls (2.6%) had false negative annotations while in another three cases technical issues led to a false positive annotation of lethality (1.9%) (see Supplementary Figure 2 for distribution of technical lethality in buffer and dsRNA injections).



## Supplementary References

1. Li, J. *et al.* Odoriferous Defensive stink gland transcriptome to identify novel genes necessary for quinone synthesis in the red flour beetle, *Tribolium castaneum*. *PLoS Genet.* **9**, e1003596 (2013).
2. Sokoloff, A., Slatis, H. M. & Stanley, J. The black Mutation in *Tribolium castaneum*. *J. Hered.* **52**, 131–135 (1960).
3. Sokoloff, A. *The biology of Tribolium: with special emphasis on genetic aspects.* (Clarendon Press, 1974).
4. Pavlopoulos, A., Berghammer, A. J., Averof, M. & Klingler, M. Efficient transformation of the beetle *Tribolium castaneum* using the Minos transposable element: quantitative and qualitative analysis of genomic integration events. *Genetics* **167**, 737–46 (2004).
5. Prout, M., Damania, Z., Soong, J., Fristrom, D. & Fristrom, J. W. Autosomal mutations affecting adhesion between wing surfaces in *Drosophila melanogaster*. *Genetics* **146**, 275–285 (1997).
6. Walsh, E. P. & Brown, N. H. A screen to identify *Drosophila* genes required for integrin-mediated adhesion. *Genetics* **150**, 791–805 (1998).
7. Angelini, D. R., Smith, F. W. & Jockusch, E. L. Extent With Modification: Leg Patterning in the Beetle *Tribolium castaneum* and the Evolution of Serial Homologs. *G3 Bethesda* **2**, 235–48 (2012).
8. Angelini, D. R., Smith, F. W., Aspiras, A. C., Kikuchi, M. & Jockusch, E. L. Patterning of the adult mandibulate mouthparts in the red flour beetle, *Tribolium castaneum*. *Genetics* **190**, 639–654 (2012).
9. Angelini, D. R., Kikuchi, M. & Jockusch, E. L. Genetic patterning in the adult capitata antenna of the beetle *Tribolium castaneum*. *Dev. Biol.* **327**, 240–251 (2009).
10. Ober, K. A. & Jockusch, E. L. The roles of wingless and decapentaplegic in axis and appendage development in the red flour beetle, *Tribolium castaneum*. *Dev Biol* **294**, 391–405 (2006).
11. Van der Zee, M., Stockhammer, O., von Levetzow, C., Nunes da Fonseca, R. & Roth, S. Sog/Chordin is required for ventral-to-dorsal Dpp/BMP transport and head formation in a short germ insect. *Proc Natl Acad Sci U A* **103**, 16307–12 (2006).
12. Namigai, E. K. & Suzuki, Y. Functional conservation and divergence of BMP ligands in limb development and lipid homeostasis of holometabolous insects. *Evol Dev* **14**, 296–310 (2012).
13. Beermann, A., Pruhs, R., Lutz, R. & Schroder, R. A context-dependent combination of Wnt receptors controls axis elongation and leg development in a short germ insect. *Development* **138**, 2793–805 (2011).
14. Cerny, A. C., Grossmann, D., Bucher, G. & Klingler, M. The *Tribolium* ortholog of knirps and knirps-related is crucial for head segmentation but plays a minor role during abdominal patterning. *Dev Biol* **321**, 284–94 (2008).
15. Posnien, N., Koniszewski, N. D. B., Hein, H. J. & Bucher, G. Candidate Gene Screen in the Red Flour Beetle *Tribolium* Reveals Six3 as Ancient Regulator of Anterior Median Head and Central Complex Development. *PLoS Genet.* **7**, e1002418 (2011).
16. Konopova, B. & Jindra, M. Broad-Complex acts downstream of Met in juvenile hormone signaling to coordinate primitive holometabolous metamorphosis. *Development* **135**, 559–68 (2008).
17. Horn, T. & Boutros, M. E-RNAi: a web application for the multi-species design of RNAi reagents--2010 update. *Nucleic Acids Res* **38**, W332–9 (2010).
